# Supplementary material
Source: PubMed Central journal article supplement (PMC5539760)
Supplement: NIHMS886286-supplement-Supplemental_Tables.pdf [file NIHMS886286-supplement-Supplemental_Tables.pdf]

Fig. 2a

|        | Days after doxIAA treatment |       |       |       |
|--------|-----------------------------|-------|-------|-------|
|        | 0                           | 3     | 6     | 8     |
| Exp. 1 | 90.94                       | 31.25 | 22.27 | 8.81  |
| Exp. 2 | 81.83                       | 32.80 | 11.89 | 9.71  |
| Exp. 3 | 82.51                       | 30.00 | 34.83 | 11.74 |
| Exp. 4 | 81.69                       |       |       |       |
| Exp. 5 | 81.62                       |       |       |       |
| Exp. 6 | 81.60                       |       |       |       |

Fig. 2b

|        | Days after doxIAA treatment |      |       |       |       |
|--------|-----------------------------|------|-------|-------|-------|
|        | 0                           | 1    | 2     | 4     | 6     |
| Exp. 1 | 7.36                        | 5.47 | 22.46 | 23.56 | 16.87 |
| Exp. 2 | 3.64                        | 6.23 | 22.87 | 21.28 | 23.74 |
| Exp. 3 | 6.04                        | 4.04 | 24.39 | 21.12 | 20.35 |

Fig. 2c

|        | Total Filmed | Total Errors | Misaligned | Lagging |
|--------|--------------|--------------|------------|---------|
| Exp. 1 | 176          | 67           | 78         | 18      |
| Exp. 2 | 225          | 120          | 108        | 12      |
| Exp. 3 | 278          | 173          | 154        | 19      |

Fig. 2g

|        | Y chr. positive | Y chr. negative | N#  |
|--------|-----------------|-----------------|-----|
| Exp. 1 | 159             | 217             | 416 |
| Exp. 2 | 79              | 62              | 141 |
| Exp. 3 | 104             | 89              | 193 |

Fig. 3b

|        | Days after doxIAA treatment |      |      |       |       |       |
|--------|-----------------------------|------|------|-------|-------|-------|
|        | 0                           | 1    | 2    | 4     | 5     |       |
| Exp. 1 | 0.00                        | 2.70 | 7.69 | 27.03 | 16.13 | 26.13 |
| Exp. 2 | 3.03                        | 0.00 | 3.23 | 21.88 | 29.03 | 19.35 |
| Exp. 3 | 3.94                        | 0.00 | 0.00 | 23.53 | 25.81 | 33.33 |

Fig. 3c

|        | 8d DoxIAA |            | 3d DoxIAA |            |
|--------|-----------|------------|-----------|------------|
|        | Intact    | Fragmented | Intact    | Fragmented |
| Exp. 1 | 99.20     | 0.80       | 75.00     | 25.00      |
| Exp. 2 | 100.00    | 0.00       | 81.37     | 18.61      |
| Exp. 3 | 100.00    | 0.00       | 85.98     | 14.02      |

Fig. 3d

|        | 8d DoxIAA |       |      |      |      | 3d DoxIAA |       |       |       |       |      |      |      |
|--------|-----------|-------|------|------|------|-----------|-------|-------|-------|-------|------|------|------|
|        | 0         | 1     | 2    | 3    | 4    | 5         | 0     | 1     | 2     | 3     | 4    | 5    |      |
| Exp. 1 | 0.80      | 0.00  | 5.60 | 0.00 | 0.00 | 1.60      | 0.00  | 21.30 | 28.70 | 33.33 | 8.33 | 8.33 | 0.00 |
| Exp. 2 | 0.00      | 95.15 | 4.85 | 0.00 | 0.00 | 0.00      | 15.69 | 45.10 | 25.49 | 6.86  | 5.88 | 0.98 | 0.00 |
| Exp. 3 | 0.00      | 92.86 | 6.12 | 1.02 | 0.00 | 0.00      | 13.08 | 55.14 | 29.56 | 6.54  | 4.67 | 0.00 | 0.00 |

Fig. 3e

|        | Non-fragmented spreads |       |       |       |      | Fragmented spreads |       |       |      |      |      |      |
|--------|------------------------|-------|-------|-------|------|--------------------|-------|-------|------|------|------|------|
|        | 0                      | 1     | 2     | 3     | 4    | 5                  | 0     | 1     | 2    | 3    | 4    | 5    |
| Exp. 1 | 0.00                   | 38.60 | 62.50 | 11.25 | 0.00 | 0.00               | 81.48 | 11.11 | 7.41 | 0.00 | 0.00 | 0.00 |
| Exp. 2 | 0.00                   | 53.66 | 30.49 | 8.54  | 6.10 | 1.22               | 80.00 | 10.00 | 5.00 | 0.00 | 5.00 | 0.00 |
| Exp. 3 | 0.00                   | 63.33 | 23.33 | 7.78  | 5.56 | 0.00               | 80.00 | 13.33 | 6.67 | 0.00 | 0.00 | 0.00 |

Fig. 3h

|        | Time after calyculin A addition (mins) |      |       |       |       |
|--------|----------------------------------------|------|-------|-------|-------|
|        | 0                                      | 15   | 30    | 45    | 60    |
| Exp. 1 | 2.94                                   | 3.69 | 22.22 | 43.45 | 82.73 |
| n#     | 136                                    | 137  | 171   | 206   | 139   |

Fig. 3i

|        | 8d DoxIAA |      | 3d DoxIAA |       |       |       |
|--------|-----------|------|-----------|-------|-------|-------|
|        | SPICE     | GG   | GG1       | GG2   |       |       |
| Exp. 1 | 5.33      | 0.00 | 2.17      | 31.58 | 4.55  | 13.43 |
| Exp. 2 | 4.23      | 2.33 | 1.52      | 18.52 | 11.90 | 16.67 |
| Exp. 3 | 3.77      | 8.61 | 2.13      | 14.68 | 2.22  | 10.64 |
| Exp. 4 | 0.00      | 0.00 | 1.41      | 9.43  | 0.00  | 11.11 |

Fig. 4e

|        | Control | LIQ4  | DNA-PK | BRCAs | RAD51 | LIQ3  | PARP1 |
|--------|---------|-------|--------|-------|-------|-------|-------|
| Exp. 1 | 23.53   | 41.94 | 62.50  | 30.50 | 20.00 | 20.00 | 22.22 |
| Exp. 2 | 15.63   | 33.33 | 36.67  | 26.67 | 23.33 | 16.67 | 3.57  |
| Exp. 3 | 16.67   | 40.00 | 30.00  | 15.63 | 16.67 | 10.00 | 21.43 |

Fig. 4f

|        | Mock   | Control | LIQ4   | DNA-PK | LIQ3 |
|--------|--------|---------|--------|--------|------|
| Exp. 1 | 100.00 | 98.11   | 703.16 | 88.74  | 6.18 |

Fig. 4g

|        | 8d DoxIAA |      |        | 3d DoxIAA |       |        |
|--------|-----------|------|--------|-----------|-------|--------|
|        | Control   | LIQ4 | DNA-PK | Control   | LIQ4  | DNA-PK |
| Exp. 1 | 0.00      | 0.00 | 0.00   | 16.67     | 13.33 | 14.71  |
| Exp. 2 | 0.00      | 0.00 | 0.00   | 16.13     | 16.13 | 2.94   |
| Exp. 3 | 6.25      | 0.00 | 0.00   | 15.15     | 14.29 | 20.69  |

Fig. 4h

|        | DMSO  | LIQ4  | DNA-PK | RAD51 |
|--------|-------|-------|--------|-------|
| Exp. 1 | 23.33 | 45.16 | 25.80  | 26.67 |
| Exp. 2 | 25.81 | 36.67 | 20.03  | 16.13 |
| Exp. 3 | 15.15 | 40.00 | 25.81  | 16.13 |
| Exp. 4 | 16.67 |       | 35.71  |       |

**Fig. 8a. Total sequencing pairs**

|                          | Chr. 1 | Chr. 2  | Chr. 3  | Chr. 4  | Chr. 5  | Chr. 6  | Chr. 7  | Chr. 8  | Chr. 9  | Chr. 10 | Chr. 11 | Chr. 12 | Chr. 13 | Chr. 14 | Chr. 15 | Chr. 16 | Chr. 17 | Chr. 18 | Chr. 19 | Chr. 20 | Chr. 21 | Chr. 22 | Chr. X  | Chr. Y  | TOTAL   |
|--------------------------|--------|---------|---------|---------|---------|---------|---------|---------|---------|---------|---------|---------|---------|---------|---------|---------|---------|---------|---------|---------|---------|---------|---------|---------|---------|
| Genomic - Replicate 1    | 348438 | 3741964 | 286770  | 2676878 | 2863452 | 2418552 | 2120611 | 2072460 | 1959200 | 2001769 | 1935535 | 1907777 | 1920900 | 1124740 | 1039198 | 1030881 | 1088608 | 672419  | 877005  | 470918  | 445413  | 1022816 | 69796   | 6046139 |         |
| Genomic - Replicate 2    | 432758 | 4287618 | 3296716 | 2966551 | 2966551 | 2717658 | 2601988 | 1921433 | 3004851 | 2268930 | 2254778 | 1719711 | 1516108 | 1381100 | 1407723 | 1400788 | 1040369 | 1000461 | 1150008 | 557003  | 607584  | 1167028 | 71677   | 4775957 |         |
| Genomic - Replicate 3    | 276598 | 276598  | 2061152 | 1838337 | 1837203 | 1723303 | 1586475 | 1519155 | 1220787 | 1920779 | 1674892 | 1430458 | 742455  | 960797  | 876239  | 914873  | 840384  | 788951  | 711088  | 733323  | 354039  | 432897  | 737612  | 45762   | 6038846 |
| Genomic - Replicate 4    | 303712 | 303712  | 2026543 | 1828512 | 1828512 | 1728512 | 1550555 | 1926496 | 1926496 | 1607781 | 1587013 | 1300166 | 1007978 | 854198  | 829112  | 651458  | 792979  | 1414009 | 543134  | 427424  | 338388  | 2169862 | 1051399 | 4008918 |         |
| Microarray - Replicate 1 | 281033 | 2568995 | 2654602 | 2383089 | 1745400 | 2144625 | 1740727 | 1396799 | 1574114 | 1868208 | 1939976 | 1384128 | 770744  | 891401  | 800239  | 854993  | 868552  | 700841  | 475142  | 571848  | 465112  | 369024  | 1862698 | 1587562 | 8313446 |
| Microarray - Replicate 2 | 357319 | 3297973 | 353025  | 3133170 | 2295977 | 312965  | 250613  | 1810179 | 2246495 | 2617054 | 1778066 | 1828318 | 6103385 | 1423771 | 1047783 | 1168645 | 833508  | 801878  | 695154  | 742943  | 689746  | 659780  | 659780  | 2431735 | 4458718 |

**Fig. 8b. Discrepant sequencing pairs (reads)**

|                          | Chr. 1 | Chr. 2 | Chr. 3 | Chr. 4 | Chr. 5 | Chr. 6 | Chr. 7 | Chr. 8 | Chr. 9 | Chr. 10 | Chr. 11 | Chr. 12 | Chr. 13 | Chr. 14 | Chr. 15 | Chr. 16 | Chr. 17 | Chr. 18 | Chr. 19 | Chr. 20 | Chr. 21 | Chr. 22 | Chr. X | Chr. Y | TOTAL |
|--------------------------|--------|--------|--------|--------|--------|--------|--------|--------|--------|---------|---------|---------|---------|---------|---------|---------|---------|---------|---------|---------|---------|---------|--------|--------|-------|
| Genomic - Replicate 1    | 646    | 709    | 331    | 331    | 346    | 203    | 236    | 196    | 146    | 300     | 184     | 205     | 69      | 68      | 103     | 73      | 71      | 46      | 90      | 12      | 12      | 42      | 1      | 465    |       |
| Genomic - Replicate 2    | 5437   | 5437   | 2413   | 2413   | 248    | 2062   | 1814   | 2082   | 1814   | 2042    | 1496    | 305     | 627     | 581     | 660     | 455     | 325     | 398     | 114     | 140     | 369     | 14      | 140    | 369    |       |
| Genomic - Replicate 3    | 4105   | 3889   | 2249   | 1886   | 1886   | 1601   | 1611   | 1180   | 818    | 2041    | 1149    | 1044    | 269     | 572     | 432     | 478     | 465     | 354     | 277     | 310     | 64      | 112     | 275    | 3      | 26717 |
| Genomic - Replicate 4    | 3687   | 3687   | 1648   | 1648   | 1006   | 1116   | 818    | 973    | 704    | 918     | 584     | 585     | 214     | 390     | 191     | 192     | 174     | 86      | 174     | 86      | 52      | 14      | 1846   | 129    |       |
| Microarray - Replicate 1 | 1923   | 1979   | 1779   | 1522   | 875    | 1333   | 878    | 624    | 702    | 1042    | 545     | 623     | 185     | 276     | 235     | 283     | 202     | 182     | 05      | 126     | 79      | 52      | 873    | 468    | 16548 |
| Microarray - Replicate 2 | 3681   | 3107   | 3570   | 2764   | 1655   | 2692   | 1033   | 1033   | 1437   | 1048    | 953     | 981     | 338     | 430     | 364     | 434     | 208     | 283     | 125     | 159     | 154     | 108     | 885    | 1140   | 30310 |

**Fig. 8c. Discrepant sequencing pairs (reads)**

|                          | Chr. 1 | Chr. 2 | Chr. 3 | Chr. 4 | Chr. 5 | Chr. 6 | Chr. 7 | Chr. 8 | Chr. 9 | Chr. 10 | Chr. 11 | Chr. 12 | Chr. 13 | Chr. 14 | Chr. 15 | Chr. 16 | Chr. 17 | Chr. 18 | Chr. 19 | Chr. 20 | Chr. 21 | Chr. 22 | Chr. X | Chr. Y | TOTAL |
|--------------------------|--------|--------|--------|--------|--------|--------|--------|--------|--------|---------|---------|---------|---------|---------|---------|---------|---------|---------|---------|---------|---------|---------|--------|--------|-------|
| Genomic - Replicate 1    | 646    | 709    | 331    | 331    | 346    | 203    | 236    | 196    | 146    | 300     | 184     | 205     | 69      | 68      | 103     | 73      | 71      | 46      | 90      | 12      | 12      | 42      | 1      | 465    |       |
| Genomic - Replicate 2    | 5437   | 5437   | 2413   | 2413   | 248    | 2062   | 1814   | 2082   | 1814   | 2042    | 1496    | 305     | 627     | 581     | 660     | 455     | 325     | 398     | 114     | 140     | 369     | 14      | 140    | 369    |       |
| Genomic - Replicate 3    | 4105   | 3889   | 2249   | 1886   | 1886   | 1601   | 1611   | 1180   | 818    | 2041    | 1149    | 1044    | 269     | 572     | 432     | 478     | 465     | 354     | 277     | 310     | 64      | 112     | 275    | 3      | 26717 |
| Genomic - Replicate 4    | 3687   | 3687   | 1648   | 1648   | 1006   | 1116   | 818    | 973    | 704    | 918     | 584     | 585     | 214     | 390     | 191     | 192     | 174     | 86      | 174     | 86      | 52      | 14      | 1846   | 129    |       |
| Microarray - Replicate 1 | 1923   | 1979   | 1779   | 1522   | 875    | 1333   | 878    | 624    | 702    | 1042    | 545     | 623     | 185     | 276     | 235     | 283     | 202     | 182     | 05      | 126     | 79      | 52      | 873    | 468    | 16548 |
| Microarray - Replicate 2 | 3681   | 3107   | 3570   | 2764   | 1655   | 2692   | 1033   | 1033   | 1437   | 1048    | 953     | 981     | 338     | 430     | 364     | 434     | 208     | 283     | 125     | 159     | 154     | 108     | 885    | 1140   | 30310 |

**Fig. 8d. Discrepant sequencing pairs (reads)**

|                          | Chr. 1 | Chr. 2 | Chr. 3 | Chr. 4 | Chr. 5 | Chr. 6 | Chr. 7 | Chr. 8 | Chr. 9 | Chr. 10 | Chr. 11 | Chr. 12 | Chr. 13 | Chr. 14 | Chr. 15 | Chr. 16 | Chr. 17 | Chr. 18 | Chr. 19 | Chr. 20 | Chr. 21 | Chr. 22 | Chr. X | Chr. Y | TOTAL |
|--------------------------|--------|--------|--------|--------|--------|--------|--------|--------|--------|---------|---------|---------|---------|---------|---------|---------|---------|---------|---------|---------|---------|---------|--------|--------|-------|
| Genomic - Replicate 1    | 646    | 709    | 331    | 331    | 346    | 203    | 236    | 196    | 146    | 300     | 184     | 205     | 69      | 68      | 103     | 73      | 71      | 46      | 90      | 12      | 12      | 42      | 1      | 465    |       |
| Genomic - Replicate 2    | 5437   | 5437   | 2413   | 2413   | 248    | 2062   | 1814   | 2082   | 1814   | 2042    | 1496    | 305     | 627     | 581     | 660     | 455     | 325     | 398     | 114     | 140     | 369     | 14      | 140    | 369    |       |
| Genomic - Replicate 3    | 4105   | 3889   | 2249   | 1886   | 1886   | 1601   | 1611   | 1180   | 818    | 2041    | 1149    | 1044    | 269     | 572     | 432     | 478     | 465     | 354     | 277     | 310     | 64      | 112     | 275    | 3      | 26717 |
| Genomic - Replicate 4    | 3687   | 3687   | 1648   | 1648   | 1006   | 1116   | 818    | 973    | 704    | 918     | 584     | 585     | 214     | 390     | 191     | 192     | 174     | 86      | 174     | 86      | 52      | 14      | 1846   | 129    |       |
| Microarray - Replicate 1 | 1923   | 1979   | 1779   | 1522   | 875    | 1333   | 878    | 624    | 702    | 1042    | 545     | 623     | 185     | 276     | 235     | 283     | 202     | 182     | 05      | 126     | 79      | 52      | 873    | 468    | 16548 |
| Microarray - Replicate 2 | 3681   | 3107   | 3570   | 2764   | 1655   | 2692   | 1033   | 1033   | 1437   | 1048    | 953     | 981     | 338     | 430     | 364     | 434     | 208     | 283     | 125     | 159     | 154     | 108     | 885    | 1140   | 30310 |

**Fig. 8e. Discrepant sequencing pairs (reads)**

|                          | Chr. 1 | Chr. 2 | Chr. 3 | Chr. 4 | Chr. 5 | Chr. 6 | Chr. 7 | Chr. 8 | Chr. 9 | Chr. 10 | Chr. 11 | Chr. 12 | Chr. 13 | Chr. 14 | Chr. 15 | Chr. 16 | Chr. 17 | Chr. 18 | Chr. 19 | Chr. 20 | Chr. 21 | Chr. 22 | Chr. X | Chr. Y | TOTAL |
|--------------------------|--------|--------|--------|--------|--------|--------|--------|--------|--------|---------|---------|---------|---------|---------|---------|---------|---------|---------|---------|---------|---------|---------|--------|--------|-------|
| Genomic - Replicate 1    | 646    | 709    | 331    | 331    | 346    | 203    | 236    | 196    | 146    | 300     | 184     | 205     | 69      | 68      | 103     | 73      | 71      | 46      | 90      | 12      | 12      | 42      | 1      | 465    |       |
| Genomic - Replicate 2    | 5437   | 5437   | 2413   | 2413   | 248    | 2062   | 1814   | 2082   | 1814   | 2042    | 1496    | 305     | 627     | 581     | 660     | 455     | 325     | 398     | 114     | 140     | 369     | 14      | 140    | 369    |       |
| Genomic - Replicate 3    | 4105   | 3889   | 2249   | 1886   | 1886   | 1601   | 1611   | 1180   | 818    | 2041    | 1149    | 1044    | 269     | 572     | 432     | 478     | 465     | 354     | 277     | 310     | 64      | 112     | 275    | 3      | 26717 |
| Genomic - Replicate 4    | 3687   | 3687   | 1648   | 1648   | 1006   | 1116   | 818    | 973    | 704    | 918     | 584     | 585     | 214     | 390     | 191     | 192     | 174     | 86      | 174     | 86      | 52      | 14      | 1846   | 129    |       |
| Microarray - Replicate 1 | 1923   | 1979   | 1779   | 1522   | 875    | 1333   | 878    | 624    | 702    | 1042    | 545     | 623     | 185     | 276     | 235     | 283     | 202     | 182     | 05      | 126     | 79      | 52      | 873    | 468    | 16548 |
| Microarray - Replicate 2 | 3681   | 3107   | 3570   | 2764   | 1655   | 2692   | 1033   | 1033   | 1437   | 1048    | 953     | 981     | 338     | 430     | 364     | 434     | 208     | 283     | 125     | 159     | 154     | 108     | 885    | 1140   | 30310 |

**Fig. 8f. Discrepant sequencing pairs (reads)**

|                          | Chr. 1 | Chr. 2 | Chr. 3 | Chr. 4 | Chr. 5 | Chr. 6 | Chr. 7 | Chr. 8 | Chr. 9 | Chr. 10 | Chr. 11 | Chr. 12 | Chr. 13 | Chr. 14 | Chr. 15 | Chr. 16 | Chr. 17 | Chr. 18 | Chr. 19 | Chr. 20 | Chr. 21 | Chr. 22 | Chr. X | Chr. Y | TOTAL |
|--------------------------|--------|--------|--------|--------|--------|--------|--------|--------|--------|---------|---------|---------|---------|---------|---------|---------|---------|---------|---------|---------|---------|---------|--------|--------|-------|
| Genomic - Replicate 1    | 646    | 709    | 331    | 331    | 346    | 203    | 236    | 196    | 146    | 300     | 184     | 205     | 69      | 68      | 103     | 73      | 71      | 46      | 90      | 12      | 12      | 42      | 1      | 465    |       |
| Genomic - Replicate 2    | 5437   | 5437   | 2413   | 2413   | 248    | 2062   | 1814   | 2082   | 1814   | 2042    | 1496    | 305     | 627     | 581     | 660     | 455     | 325     | 398     | 114     | 140     | 369     | 14      | 140    | 369    |       |
| Genomic - Replicate 3    | 4105   | 3889   | 2249   | 1886   | 1886   | 1601   | 1611   | 1180   | 818    | 2041    | 1149    | 1044    | 269     | 572     | 432     | 478     | 465     | 354     | 277     | 310     | 64      | 112     | 275    | 3      | 26717 |
| Genomic - Replicate 4    | 3687   | 3687   | 1648   | 1648   | 1006   | 1116   | 818    | 973    | 704    | 918     | 584     | 585     | 214     | 390     | 191     | 192     | 174     | 86      | 174     | 86      | 52      | 14      | 1846   | 129    |       |
| Microarray - Replicate 1 | 1923   | 1979   | 1779   | 1522   | 875    | 1333   | 878    | 624    | 702    | 1042    | 545     | 623     | 185     | 276     | 235     | 283     | 202     | 182     | 05      | 126     | 79      | 52      | 873    | 468    | 16548 |
| Microarray - Replicate 2 | 3681   | 3107   | 3570   | 2764   | 1655   | 2692   | 1033   | 1033   | 1437   | 1048    | 953     | 981     | 338     | 430     | 364     | 434     | 208     | 283     | 125     | 159     | 154     | 108     | 885    | 1140   | 30310 |

**Fig. 8g. Discrepant sequencing pairs (reads)**

|                       | Chr. 1 | Chr. 2 | Chr. 3 | Chr. 4 | Chr. 5 | Chr. 6 | Chr. 7 | Chr. 8 | Chr. 9 | Chr. 10 | Chr. 11 | Chr. 12 | Chr. 13 | Chr. 14 | Chr. 15 | Chr. 16 | Chr. 17 | Chr. 18 | Chr. 19 | Chr. 20 | Chr. 21 | Chr. 22 | Chr. X | Chr. Y | TOTAL |
|-----------------------|--------|--------|--------|--------|--------|--------|--------|--------|--------|---------|---------|---------|---------|---------|---------|---------|---------|---------|---------|---------|---------|---------|--------|--------|-------|
| Genomic - Replicate 1 | 646    | 709    | 331    | 331    | 346    | 203    | 236    | 196    | 146    | 300     | 184     | 205     | 69      | 68      | 103     | 73      | 71      | 46      | 90      | 12      | 12      | 42      | 1      | 465    |       |
| Genomic - Replicate 2 | 5437   | 5437   | 2413   | 2413   | 248    | 2062   | 1814   | 2082   | 1814   | 2042    | 1496    | 305     | 627     | 581     | 660     | 455     | 325     | 398     | 114     | 140     | 369     | 14      | 140    | 369    |       |
| Genomic - Replicate 3 | 4105   | 3889   | 2249   | 1886   | 1886   | 1601   | 1611   | 1180   | 818    | 2041    | 1149    | 1044    | 269     | 572     | 432     |         |         |         |         |         |         |         |        |        |       |
